# Supplementary material
Source: PubMed Central journal article supplement (PMC7304816)
Supplement: ab0c00202_si_001.pdf [file ab0c00202_si_001.pdf]

# Supporting Information

## Manual versus Microfluidic-assisted Nanoparticle

### Manufacture: Impact of Silk Fibroin Stock on Nanoparticle

#### Characteristics

*Jana I. Solomun,<sup>‡,§</sup> John D. Totten,<sup>‡,§</sup> Thidarat Wongpinyochit,<sup>†</sup> Alastair J. Florence,<sup>†,§</sup> and F. Philipp Seib<sup>†,§§§,§</sup>*

<sup>†</sup> Strathclyde Institute of Pharmacy and Biomedical Sciences, University of Strathclyde, 161 Cathedral Street, Glasgow, G4 0RE, U.K.

<sup>‡</sup> Jena Center for Soft Matter (JCSM), Friedrich-Schiller-University, Philosophenweg 7, 07743 Jena, Germany

<sup>§</sup> EPSRC Future Manufacturing Research Hub for Continuous Manufacturing and Advanced Crystallisation (CMAC), University of Strathclyde, Technology and Innovation Centre, 99 George Street, Glasgow G1 1RD, U.K.

<sup>§</sup> Leibniz Institute of Polymer Research Dresden, Max Bergmann Center of Biomaterials Dresden, Hohe Strasse 6, 01069 Dresden, Germany

Number of pages: S1-S4

Number of figures: S1-S4

Number of tables: S1

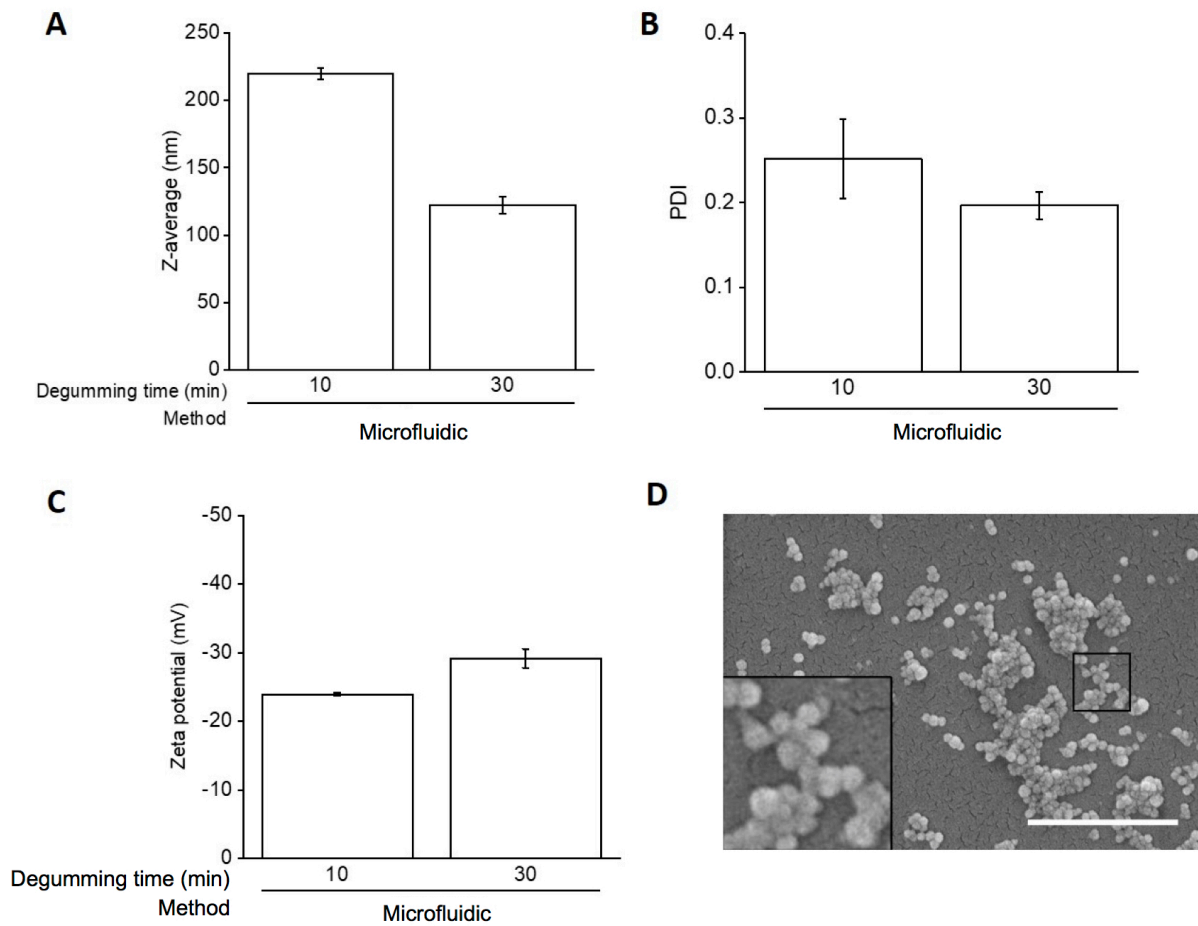

**Figure S1.** Characterisation of nanoparticles manufactured by the microfluidic method using 10 and 30 minutes degummed silk. Nanoparticles were characterised by DLS in terms of (A) z-average, (B) PDI and (C) zeta potential (mean  $\pm$ SD, 10 minutes n=1 (3 technical replicates), 30 minutes n=2). (D) Morphology of nanoparticles from 30 minutes degummed silk was investigated by SEM.

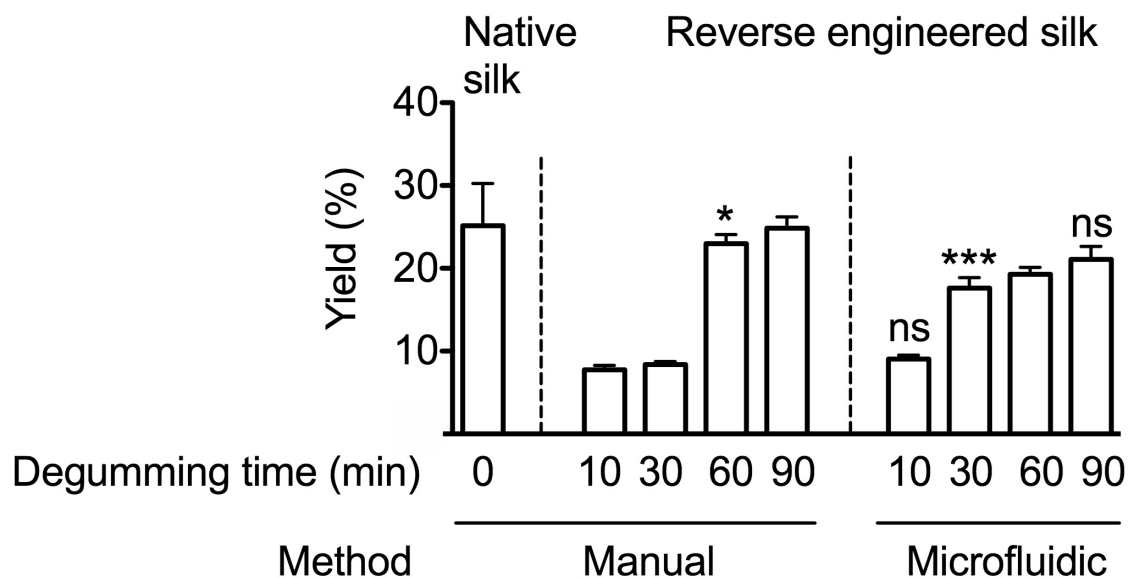

**Figure S2.** Impact of degumming time and manufacturing method on nanoparticle yields. Statistical analyses were performed by comparing equal degumming times of manual with the microfluidic method using the Student's t-test (samples run as three technical replicates unless stated otherwise. Native silk n=2 ; Manual: 10 minutes n=3; 30 minutes n=2 ; 60 minutes n=3 ; 90 minutes n=3; Microfluidic: 10 minutes n=1 only 2 replicates; 30 minutes n= 2; 30 minutes n=2 ; 60 minutes n=3 ; 90 minutes n=2).

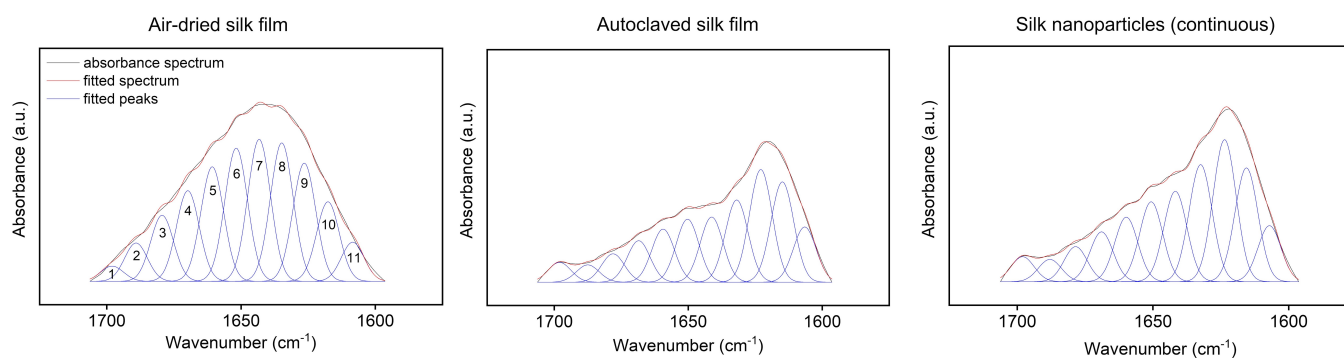

**Figure S3.** Band fitting to absorbance spectra shown exemplary for 60 minutes degummed silk (A) air dried film, (B) autoclaved film and (C) nanoparticles formulated by the batch method. Peaks are numbered according to Table S1.

**Table S1.** Assignment of fitted peaks to secondary structure according to Hu et al.<sup>46</sup>

| Peak                           | 1          | 2         | 3         | 4         | 5           | 6           | 7           | 8          | 9          | 10         | 11         |
|--------------------------------|------------|-----------|-----------|-----------|-------------|-------------|-------------|------------|------------|------------|------------|
| Wavenumber (cm <sup>-1</sup> ) | 1697-1703  | 1686-1696 | 1671-1685 | 1663-1670 | 1656-1662   | 1647-1655   | 1638-1646   | 1628-1637  | 1622-1627  | 1616-1621  | 1605-1616  |
| Secondary structure            | Beta sheet | Turns     | Turns     | Turns     | Alpha helix | Random coil | Random coil | Beta sheet | Beta sheet | Beta sheet | Side chain |

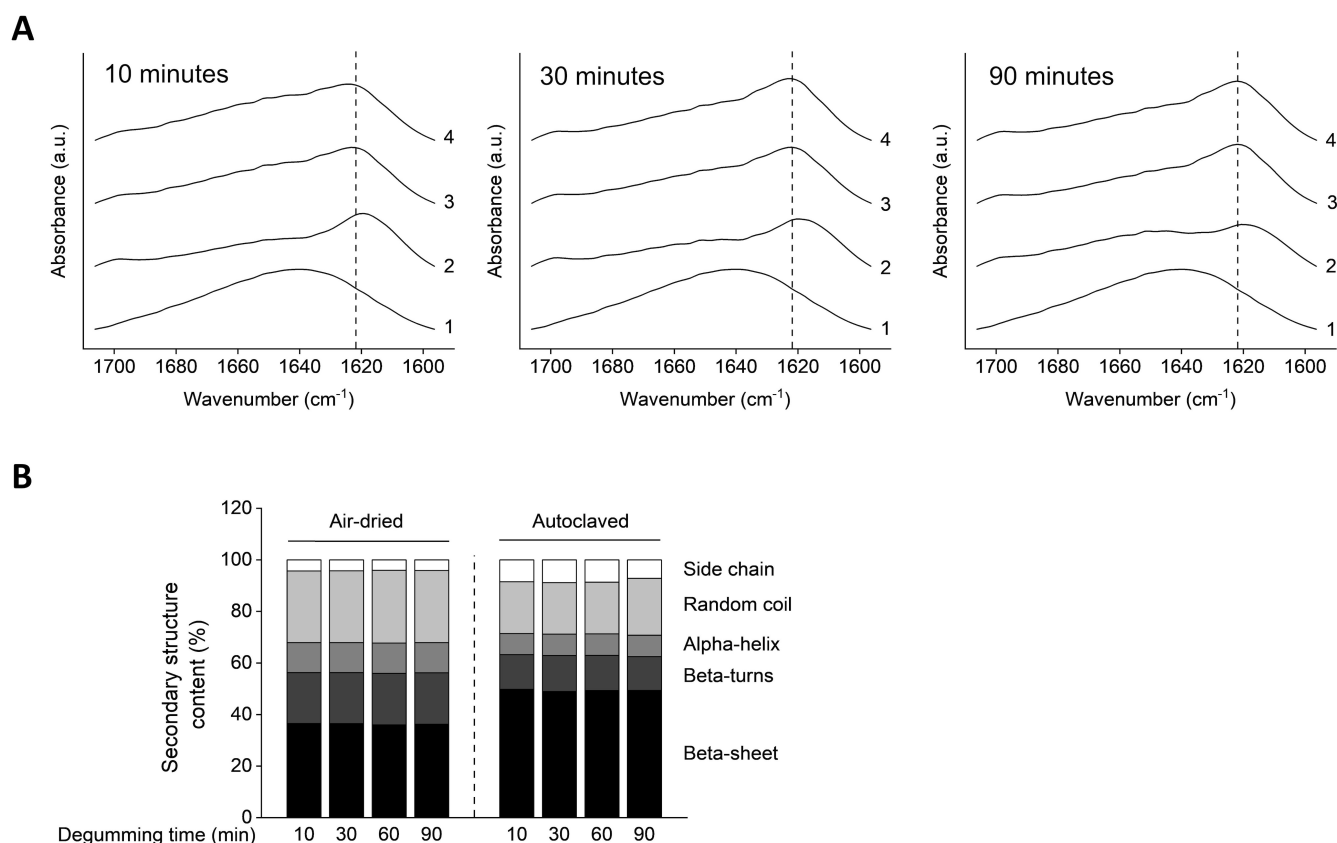

**Figure S4.** (A) FTIR absorbance spectra in the amide I region of (1) air dried silk film, (2) autoclaved silk film, silk nanoparticles manufactured by (3) batch method and (4) continuous method using 10, 30 or 90 minute degummed silk. The dashed line marks the characteristic absorption band for antiparallel beta-sheet structure between 1622-1627 cm<sup>-1</sup>. (B) Comparison of secondary structure content of air dried and autoclaved silk films made from 10-, 30-, 60- or 90-minute degummed silk.
